# Supplementary material for: The Impact of Coronavirus Information-Seeking Behavior on Dental Care Access: A Cross-Sectional Questionnaire-Based Study
Source: MDPI journal article supplement (doi:10.3390/ijerph182212050), 2021-11-17
Supplement: s1 [file s1]

**Table S1.** This is the English version of the original questionnaire in the Italian language (<https://forms.gle/sAP8E5D3pWgs9pn46>).

| Question                                                              | Variables                     |
|-----------------------------------------------------------------------|-------------------------------|
| <b>Q1. Select your age group</b>                                      | 18–24                         |
|                                                                       | 25–34                         |
|                                                                       | 35–44                         |
|                                                                       | 45–54                         |
|                                                                       | 55–64                         |
|                                                                       | 65–74                         |
|                                                                       | Over 75                       |
| <b>Q2. Gender</b>                                                     | Female                        |
|                                                                       | Male                          |
| <b>Q3. Region of Residency</b>                                        | Open Answer                   |
| <b>Q4. Marital Status</b>                                             | Unmarried                     |
|                                                                       | Married                       |
|                                                                       | Separated                     |
|                                                                       | Divorced                      |
|                                                                       | Widowed                       |
| <b>Q5. Including yourself, how many people are in your household?</b> | 1                             |
|                                                                       | 2                             |
|                                                                       | 3                             |
|                                                                       | 4                             |
|                                                                       | 4+                            |
| <b>Q6. What is your educational level?</b>                            | Primary School                |
|                                                                       | Middle School                 |
|                                                                       | High School                   |
|                                                                       | Bachelor's degree             |
|                                                                       | Master's degree               |
|                                                                       | PhD/Specialization School     |
| <b>Q7. What is your current employment status?</b>                    | Employed in a public company  |
|                                                                       | Employed in a private company |
|                                                                       | Self Employed/Freelance       |
|                                                                       | Entrepreneur                  |

|                                                                                                                    |                                                                                         |
|--------------------------------------------------------------------------------------------------------------------|-----------------------------------------------------------------------------------------|
|                                                                                                                    | Housekeeper                                                                             |
|                                                                                                                    | Unemployed                                                                              |
|                                                                                                                    | Student                                                                                 |
|                                                                                                                    | Retired                                                                                 |
| <b>Q8. Did the coronavirus pandemic reduce the income of your household?</b>                                       | No, income remained unchanged.                                                          |
|                                                                                                                    | Yes, income was reduced up to 20%                                                       |
|                                                                                                                    | Yes, income was reduced between 20 and 50%                                              |
|                                                                                                                    | Yes, income was reduced over 50%                                                        |
|                                                                                                                    | Yes, household income reduced to zero                                                   |
| <b>Q9. How much do you fear being infected by SARS-CoV-2?</b>                                                      | 1 (Not at all)                                                                          |
|                                                                                                                    | 2 (A Little)                                                                            |
|                                                                                                                    | 3 (Quite)                                                                               |
|                                                                                                                    | 4 (A Lot)                                                                               |
|                                                                                                                    | 5 (Extremely)                                                                           |
| <b>Q10. How much do you fear SARS-CoV-2 could infect your dearest ones?</b>                                        | 1 (Not at all)                                                                          |
|                                                                                                                    | 2 (A Little)                                                                            |
|                                                                                                                    | 3 (Quite)                                                                               |
|                                                                                                                    | 4 (A Lot)                                                                               |
|                                                                                                                    | 5 (Extremely)                                                                           |
| <b>Q11. How much do you feel comfortable when you go out of your home?</b>                                         | 1 (Not at all)                                                                          |
|                                                                                                                    | 2 (A Little)                                                                            |
|                                                                                                                    | 3 (Quite)                                                                               |
|                                                                                                                    | 4 (A Lot)                                                                               |
|                                                                                                                    | 5 (Extremely)                                                                           |
| <b>Q12. With respect to the modalities of contagion from coronavirus...</b>                                        | I feel anxious                                                                          |
|                                                                                                                    | I feel quiet, it is enough to respect the safety measures                               |
|                                                                                                                    | I think the virus has lost its effect, it is less aggressive and contagious than before |
| <b>Q13. How much do you think that fear of being infected might generate or has generated collective hysteria?</b> | 1 (Not at all)                                                                          |
|                                                                                                                    | 2 (A Little)                                                                            |
|                                                                                                                    | 3 (Quite)                                                                               |
|                                                                                                                    | 4 (A Lot)                                                                               |
|                                                                                                                    | 5 (Extremely)                                                                           |
|                                                                                                                    | Yes                                                                                     |

**Q14. Beyond the information received from TVs and newspapers, did you look for more information on COVID-19?**

No

**Q15. Through which channels did you become informed on COVID-19? You can select more than one option.**

Newspapers/Online newspapers

TV/Radio

Social Media (Facebook, Instagram, YouTube...)

Blog/Forum

Journals or Websites of Medicine, Health, Wellness

Family Doctor/Other Doctors/Chemist

Other

**Q16. How much do you think these channels are reliable to obtain information on COVID-19? Assign a value from 1 to 5, where 1 is "Not at all" and 5 is "Extremely".**

1

2

3

4

5

Newspapers/Online newspapers

TV/Radio

Social Media (Facebook, Instagram, YouTube, etc.)

Blog/Forum

Journals or Websites of Medicine, Health, Wellness

Family Doctor/Other Doctors/Chemist

Friends and Relatives

**Q17. How much do you think you are informed about the modalities of contagion from SARS-CoV-2?**

1 (Not at all)

2 (A Little)

3 (Quite)

4 (A Lot)

5 (Extremely)

1 (Not at all)

2 (A Little)

|                                                                                                                     |                                                                                                                             |
|---------------------------------------------------------------------------------------------------------------------|-----------------------------------------------------------------------------------------------------------------------------|
| Q18. How much do you fear a new diffusion of coronavirus after the reopening of activities?                         | 3 (Quite)                                                                                                                   |
|                                                                                                                     | 4 (A Lot)                                                                                                                   |
|                                                                                                                     | 5 (Extremely)                                                                                                               |
| Q19. How much do you think the measures adopted to limit contagion are effective?                                   | 1 (Not at all)                                                                                                              |
|                                                                                                                     | 2 (A Little)                                                                                                                |
|                                                                                                                     | 3 (Quite)                                                                                                                   |
|                                                                                                                     | 4 (A Lot)                                                                                                                   |
|                                                                                                                     | 5 (Extremely)                                                                                                               |
| Q20. What is the safety distance between two people who are NOT wearing a face mask?                                | At least 1 meter                                                                                                            |
|                                                                                                                     | 2 meters                                                                                                                    |
|                                                                                                                     | More than 2 meters                                                                                                          |
| Q21. What is the safety distance between two people who are both wearing a face mask?                               | At least 1 meter                                                                                                            |
|                                                                                                                     | 2 meters                                                                                                                    |
|                                                                                                                     | More than 2 meters                                                                                                          |
|                                                                                                                     | The safety distance is not needed                                                                                           |
| Q22. If two persons are physically close and just one of them is wearing a face mask, is there a risk of infection? | Yes                                                                                                                         |
|                                                                                                                     | No                                                                                                                          |
|                                                                                                                     | It depends on the kind of face mask, some of them protect from contagion and at the same time do not allow to infect others |
|                                                                                                                     | I do not know                                                                                                               |
| Q23. During Phase 2, do you think you will resume the activities you left behind at the beginning of the emergency? | As before the crisis, with no fear                                                                                          |
|                                                                                                                     | As before the crisis, with fear                                                                                             |
|                                                                                                                     | Less than before, with no fear                                                                                              |
|                                                                                                                     | Less than before and with fear                                                                                              |
|                                                                                                                     | With fear                                                                                                                   |
|                                                                                                                     | I will not resume                                                                                                           |
| Q24. What is the main reason for your visits to the dentist?                                                        | I only go for emergencies                                                                                                   |
|                                                                                                                     | I go for control visits or regular oral hygiene appointments                                                                |
|                                                                                                                     | I am following a treatment plan                                                                                             |
|                                                                                                                     | I do not go / I've never been to a dentist → if so, you can skip directly to question 30                                    |
|                                                                                                                     | Yes                                                                                                                         |

**Q25. Do you have a trusted dentist?**

No

**Q26. Which type of dentist clinic are you used to visiting?**

Private

Public

Low-Cost Chain

Affiliated Private Clinic

**Q27. Where is the clinic you visit?**

In the same province and city I live in

In the same province I live in but in a different city

In a different province but in the same region I live in

In a different region from the one I live in

Abroad

**Q28. For how many years have you visited the same dentist?**

Less than 1 year

2-3 years

More than 3 years

**Q29. How often do you go to the dentist?**

In case of necessity

At least once a year

A couple of times a year

Three times or more per year

**Q30. From 9 March to 4 May 2020, did you need to undergo oral care?**

Yes

No→ if so, you can skip directly to question 34

**Q31. What was your behavior?**

I underwent without any problem

I underwent with fear

I postponed them to a date to be determined

The problem was solved telematically

The clinic postponed or canceled the appointment

The Dentist was wearing Personal Protective Equipment

**Q32. How much did these measures make you feel safe? You can choose more than one option.**

I could smell the disinfectant

I was informed about the precautionary measures adopted

I looked for information on various channels

I fully trust my dentist

I was not feeling safe

Positively

|                                                                                                              |                                                       |
|--------------------------------------------------------------------------------------------------------------|-------------------------------------------------------|
| <b>Q33. Having undergone the oral care treatment, how do you evaluate the experience?</b>                    | Negatively                                            |
|                                                                                                              | I do not know                                         |
|                                                                                                              | Other                                                 |
| <b>Q34. Do you have any scheduled appointments in the next months?</b>                                       | Yes                                                   |
|                                                                                                              | No                                                    |
| <b>Q35. How will or would you behave if you have scheduled appointments at the dentist?</b>                  | I would undergo oral care without any problem         |
|                                                                                                              | I would undergo oral care with fear                   |
|                                                                                                              | I would postpone the appointment                      |
|                                                                                                              | I would cancel the appointment                        |
| <b>Q36. What do you think might be the main reason to cancel a scheduled oral care appointment?</b>          | Fear of contagion                                     |
|                                                                                                              | Non-urgent cures                                      |
|                                                                                                              | Lowered income                                        |
|                                                                                                              | I would rather the number of new cases decreases more |
|                                                                                                              | Other                                                 |
| <b>Q37. During Phase 2, how comfortable would you feel in starting/going on with oral care?</b>              | 1 (Not at all)                                        |
|                                                                                                              | 2 (A Little)                                          |
|                                                                                                              | 3 (Quite)                                             |
|                                                                                                              | 4 (A Lot)                                             |
|                                                                                                              | 5 (Extremely)                                         |
| <b>Q38. During Phase 2, how much do you think the risk of contagion could affect your next appointments?</b> | 1 (Not at all)                                        |
|                                                                                                              | 2 (A Little)                                          |
|                                                                                                              | 3 (Quite)                                             |
|                                                                                                              | 4 (A Lot)                                             |
|                                                                                                              | 5 (Extremely)                                         |
| <b>Q39. How urgent do you think it is to resume with the cures you stopped?</b>                              | 1 (Not at all)                                        |
|                                                                                                              | 2 (A Little)                                          |
|                                                                                                              | 3 (Quite)                                             |
|                                                                                                              | 4 (A Lot)                                             |
|                                                                                                              | 5 (Extremely)                                         |
| <b>Q40. How much do you trust your dentist regarding sterilization and</b>                                   | 1 (Not at all)                                        |
|                                                                                                              | 2 (A Little)                                          |
|                                                                                                              | 3 (Quite)                                             |

|                                                                                                                        |                                                           |
|------------------------------------------------------------------------------------------------------------------------|-----------------------------------------------------------|
| <b>sanitization of tools and environment?</b>                                                                          | 4 (A Lot)                                                 |
|                                                                                                                        | 5 (Extremely)                                             |
| <b>Q41. Did your dentist give you all the information on the sanitization procedures adopted in the dental office?</b> | Yes                                                       |
|                                                                                                                        | No                                                        |
| <b>Q42. Through which means of communication did you obtain the information? You can select more than one option.</b>  | Phone Call                                                |
|                                                                                                                        | Talk                                                      |
|                                                                                                                        | Message                                                   |
|                                                                                                                        | Email                                                     |
|                                                                                                                        | Social Network                                            |
|                                                                                                                        | I did not receive any information                         |
|                                                                                                                        | Other                                                     |
| <b>Q43. Will you look for further information to feel safer with concern to access to oral care?</b>                   | No, I feel safe and I will not look for other information |
|                                                                                                                        | Yes, I will directly call the Clinic or the dentist       |
|                                                                                                                        | Yes, I will browse the website of the Clinic              |
|                                                                                                                        | Yes, I will browse websites specialized in medicine       |
|                                                                                                                        | Yes, I will ask for information on social media           |
|                                                                                                                        | Yes, I will get informed through friends and family       |
|                                                                                                                        | Other                                                     |
